# Supplementary material
Source: PubMed Central journal article supplement (PMC5381806)
Supplement: NIHMS852203-supplement-SI.pdf [file NIHMS852203-supplement-SI.pdf]

## Rotamer-restricted fluorogenicity of the bis-arsenical ReAsH

Allison S. Walker,<sup>#</sup> Paul X. Rablen,<sup>§</sup> and Alanna Schepartz<sup>#¶\*</sup>

<sup>#</sup>Department of Chemistry and <sup>¶</sup>Molecular, Cellular, and Developmental Biology, Yale University, 225 Prospect St., New Haven CT 06520-8107. <sup>§</sup>Department of Chemistry & Biochemistry, Swarthmore College, 500 College Ave., Swarthmore, PA 19081-1397

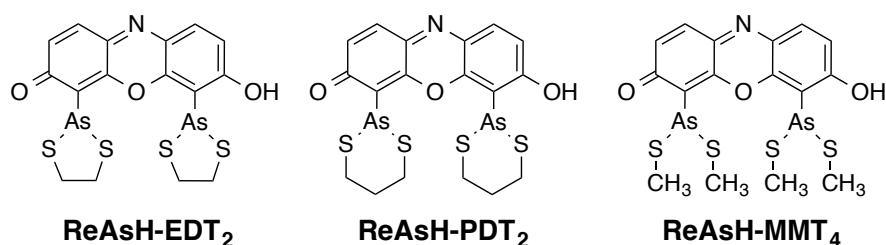

**Figure S1.** Structures of bis-arsenicals ReAsH-EDT<sub>2</sub>, ReAsH-PDT<sub>2</sub>, and ReAsH-MMT<sub>4</sub>.

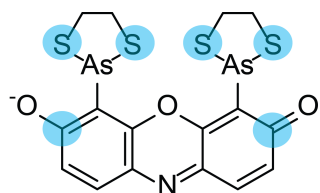

**Figure S2.** Structure of ReAsH-EDT<sub>2</sub> illustrating the atoms frozen during minimization of the minimum energy quenched structure ( $\Omega = -160^\circ$ ,  $\Omega' = 51^\circ$ ). Atoms highlighted in blue were frozen during the relaxation. The resulting structure remained quenched.

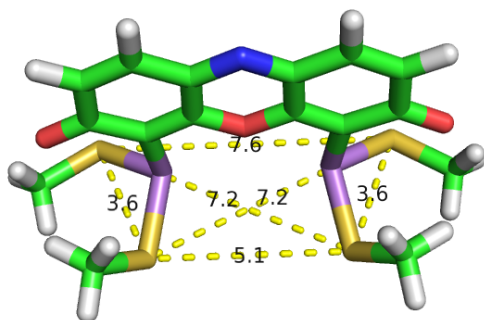

**Figure S3.** Minimized structure of ReAsH-MMT<sub>4</sub> illustrating the 6 interatomic distances ( $D_{\text{ideal}}$ ) used to evaluate Cys<sub>4</sub> motifs in previously studied target proteins p53, EmGFP, and CRABP I. The deviation from this geometry was determined using Equation 1.

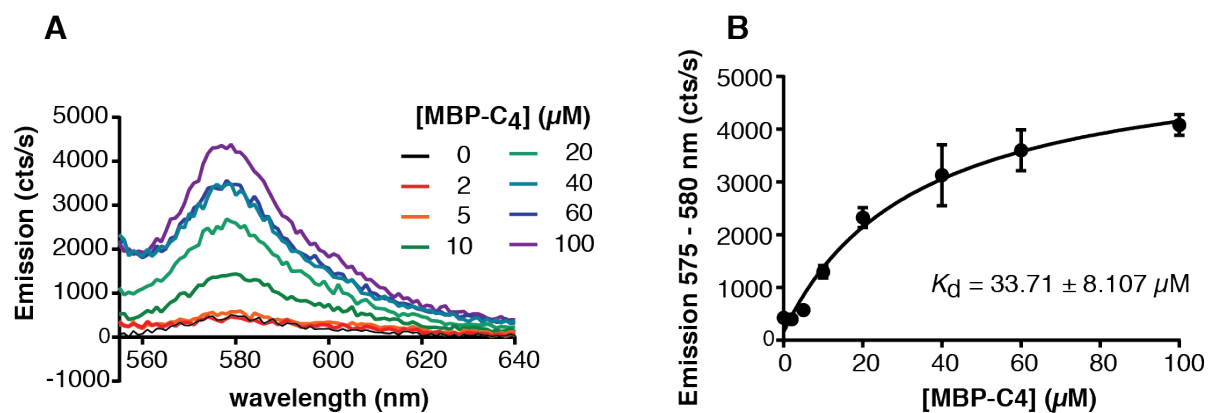

**Figure S4. Evaluating the affinity of ReAsH for MBP-C4.** (A) Representative emission spectra of 100 nM ReAsH-EDT<sub>2</sub> as a function of [MBP-C4]. (B) A plot of the average emission between 575 nm and 585 nm of 100 nM ReAsH-EDT<sub>2</sub> as a function of [MBP-C4]. Data was fit as described under Methods.

### Coordinates of minimized structures

#### ReAsH-EDT<sub>2</sub>:

|    |          |          |          |
|----|----------|----------|----------|
| C  | 3.55204  | 3.14331  | 0.01698  |
| C  | 2.38786  | 3.80525  | 0.04164  |
| C  | 1.14177  | 3.09915  | 0.03533  |
| C  | 1.18311  | 1.67493  | 0.01883  |
| C  | 2.348    | 0.9472   | 0.00841  |
| C  | 3.60951  | 1.67969  | -0.01468 |
| C  | -1.18311 | 1.67493  | 0.01883  |
| C  | -1.14178 | 3.09915  | 0.03533  |
| C  | -2.38787 | 3.80525  | 0.04163  |
| H  | -2.34946 | 4.87961  | 0.06013  |
| C  | -3.55205 | 3.1433   | 0.01697  |
| C  | -3.60951 | 1.67968  | -0.01468 |
| C  | -2.348   | 0.94719  | 0.00841  |
| H  | 4.49424  | 3.6602   | 0.01435  |
| H  | 2.34945  | 4.87961  | 0.06013  |
| H  | -4.49425 | 3.66019  | 0.01434  |
| O  | 4.69826  | 1.12121  | -0.06945 |
| O  | 0.       | 1.03393  | 0.01342  |
| N  | 0.       | 3.75029  | 0.04554  |
| As | 2.1934   | -0.96448 | -0.0176  |
| As | -2.1934  | -0.96448 | -0.01761 |
| S  | 3.57872  | -1.61181 | 1.65125  |

|   |          |          |          |
|---|----------|----------|----------|
| S | 3.58266  | -1.66758 | -1.64264 |
| S | -3.57869 | -1.61182 | 1.65126  |
| S | -3.58268 | -1.66758 | -1.64263 |
| C | 4.80735  | -2.55938 | 0.67686  |
| C | 5.10736  | -1.91755 | -0.66931 |
| C | -4.80735 | -2.55937 | 0.67688  |
| C | -5.10737 | -1.91752 | -0.66928 |
| O | -4.69826 | 1.1212   | -0.06946 |
| H | 4.44615  | -3.56955 | 0.54717  |
| H | 5.7343   | -2.58022 | -1.25395 |
| H | 5.59667  | -0.96759 | -0.54487 |
| H | 5.70782  | -2.59132 | 1.27824  |
| H | -5.70781 | -2.5913  | 1.27828  |
| H | -4.44617 | -3.56954 | 0.54718  |
| H | -5.59666 | -0.96756 | -0.54482 |
| H | -5.73433 | -2.58019 | -1.25392 |

**ReAsH-PDT<sub>2</sub>:**

|    |          |          |          |
|----|----------|----------|----------|
| C  | 3.55124  | 3.21015  | -0.00004 |
| C  | 2.38481  | 3.86759  | -0.00018 |
| C  | 1.14051  | 3.16024  | -0.00013 |
| C  | 1.18528  | 1.73231  | 0.00009  |
| C  | 2.34931  | 1.01203  | 0.00014  |
| C  | 3.60992  | 1.7451   | 0.00018  |
| C  | -1.18549 | 1.73238  | 0.00004  |
| C  | -1.14063 | 3.16031  | -0.00017 |
| C  | -2.38489 | 3.86775  | -0.00022 |
| H  | -2.3371  | 4.94239  | -0.00032 |
| C  | -3.55134 | 3.21036  | -0.00012 |
| C  | -3.61012 | 1.74529  | -0.00001 |
| C  | -2.34956 | 1.01214  | 0.00009  |
| H  | 4.49623  | 3.72189  | -0.00005 |
| H  | 2.33709  | 4.94223  | -0.00033 |
| H  | -4.49631 | 3.72214  | -0.0001  |
| O  | 4.69571  | 1.18701  | 0.00046  |
| O  | -0.00013 | 1.08918  | 0.0002   |
| N  | -0.00004 | 3.81298  | -0.00024 |
| As | 2.2114   | -0.9056  | 0.00033  |
| As | -2.21143 | -0.90547 | 0.00028  |
| S  | 3.44121  | -1.60027 | 1.74253  |
| S  | 3.44047  | -1.59991 | -1.74254 |
| S  | -3.44108 | -1.6002  | 1.74256  |
| S  | -3.44031 | -1.60038 | -1.7425  |
| O  | -4.69594 | 1.18731  | 0.00003  |

|   |          |          |          |
|---|----------|----------|----------|
| C | -5.21031 | -1.55525 | -1.2908  |
| H | -5.53608 | -0.52904 | -1.25819 |
| H | -5.6907  | -2.0491  | -2.12925 |
| C | -5.21086 | -1.55482 | 1.2901   |
| H | -5.53638 | -0.52854 | 1.25696  |
| H | -5.69176 | -2.04829 | 2.12848  |
| C | 5.21101  | -1.55488 | 1.29005  |
| H | 5.5366   | -0.52862 | 1.25735  |
| H | 5.69188  | -2.04875 | 2.12821  |
| C | 5.21044  | -1.55459 | -1.29095 |
| H | 5.53616  | -0.52836 | -1.25832 |
| H | 5.69082  | -2.0484  | -2.12944 |
| C | -5.5925  | -2.2792  | -0.00032 |
| H | -5.18802 | -3.28676 | -0.00007 |
| H | -6.67905 | -2.36899 | -0.00055 |
| C | 5.59283  | -2.27869 | -0.00061 |
| H | 6.67942  | -2.36808 | -0.00088 |
| H | 5.1888   | -3.28645 | -0.00077 |

## Supplementary References

- (1) Dennington, R.; Keith, T.; Millam, J. *Semichem Inc., Shawnee Mission, KS* **2009**.
- (2) Frisch, M. J. T., G. W.; Schlegel, H. B.; Scuseria, G. E.; Robb, M. A.; Cheeseman, J. R.; Scalmani, G.; Barone, V.; Mennucci, B.; Petersson, G. A.; Nakatsuji, H.; Caricato, M.; Li, X.; Hratchian, H. P.; Izmaylov, A. F.; Bloino, J.; Zheng, G.; Sonnenberg, J. L.; Hada, M.; Ehara, M.; Toyota, K.; Fukuda, R.; Hasegawa, J.; Ishida, M.; Nakajima, T.; Honda, Y.; Kitao, O.; Nakai, H.; Vreven, T.; Montgomery, J. A., Jr.; Peralta, J. E.; Ogliaro, F.; Bearpark, M.; Heyd, J. J.; Brothers, E.; Kudin, K. N.; Staroverov, V. N.; Kobayashi, R.; Normand, J.; Raghavachari, K.; Rendell, A.; Burant, J. C.; Iyengar, S. S.; Tomasi, J.; Cossi, M.; Rega, N.; Millam, M. J.; Klene, M.; Knox, J. E.; Cross, J. B.; Bakken, V.; Adamo, C.; Jaramillo, J.; Gomperts, R.; Stratmann, R. E.; Yazyev, O.; Austin, A. J.; Cammi, R.; Pomelli, C.; Ochterski, J. W.; Martin, R. L.; Morokuma, K.; Zakrzewski, V. G.; Voth, G. A.; Salvador, P.; Dannenberg, J. J.; Dapprich, S.; Daniels, A. D.; Farkas, Ö.; Foresman, J. B.; Ortiz, J. V.; Cioslowski, J.; Fox, D. J., Gaussian, Inc., Wallingford CT **2009**.
- (3) Coleman, D. J.; Kuntz, D. A.; Venkatesan, M.; Cook, G. M.; Williamson, S. P.; Rose, D. R.; Naleway, J. J. *Anal. Biochem.* **2010**, *399*, 7.
- (4) Pomorski, A.; Adamczyk, J.; Bishop, A. C.; Krezel, A. *Org. Biomol. Chem.* **2015**, *13*, 1395.
- (5) Goodman, J. L.; Fried, D. B.; Schepartz, A. *ChemBioChem* **2009**, *10*, 1644.
- (6) Krishnan, B.; Gierasch, L. M. *Chem. Biol.* **2008**, *15*, 1104.
